# Supplementary material for: A Ni(OH)2-modified Ti-doped α-Fe2O3photoanode for improved photoelectrochemical oxidation of urea: the role of Ni(OH)2as a cocatalyst
Source: Royal Society of Chemistry journal article supplement (doi:10.1039/c5cp03310a), 2015-01-01
Supplement: c5cp03310a1.pdf [file c5cp03310a1.pdf]

## Supporting Information

### **Ni(OH)<sub>2</sub>-modified Ti-doped $\alpha$ -Fe<sub>2</sub>O<sub>3</sub> photoanode for improved photoelectrochemical oxidation of urea: the role of Ni(OH)<sub>2</sub> as a cocatalyst**

Dandan Xu,<sup>a</sup> Zewen Fu,<sup>a</sup> Dejun Wang,<sup>a,b</sup> Yanhong Lin,<sup>a</sup> Yanjun Sun,<sup>a</sup> Dedong Meng,<sup>a</sup> Teng feng Xie<sup>\*a</sup>.

<sup>a</sup> College of Chemistry, Jilin University, Changchun 130012, People's Republic of China. E-mail: xietf@jlu.edu.cn

<sup>b</sup> Department of Chemistry, Tsinghua University, Beijing 100084, People's Republic of China.

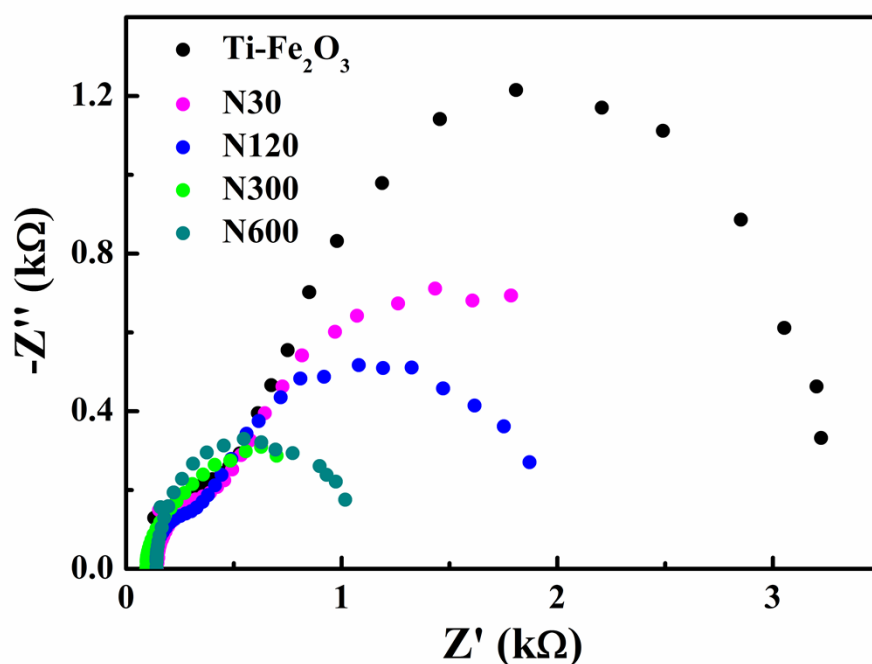

Fig. S1 Nyquist plots of PEIS measurements on Ti-Fe<sub>2</sub>O<sub>3</sub> and Ni(OH)<sub>2</sub>/Ti-Fe<sub>2</sub>O<sub>3</sub> with different electrodeposition time . The electrolyte is 1 M KOH with 0.1 M urea and the intensity of light is 100 mW/cm<sup>2</sup>.

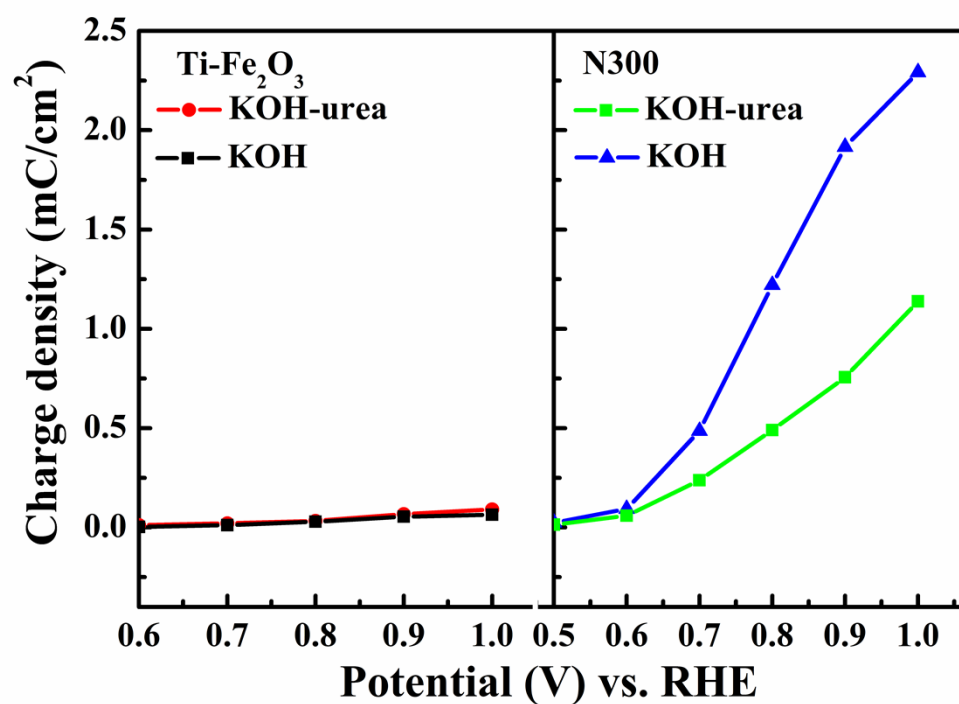

Fig. S2 Accumulated charge density at different applied potentials of Ti-Fe<sub>2</sub>O<sub>3</sub> and N300 in 1 M KOH and 1 M KOH with 0.1 M urea electrolytes under an illumination of 100 mW/ cm<sup>2</sup>.

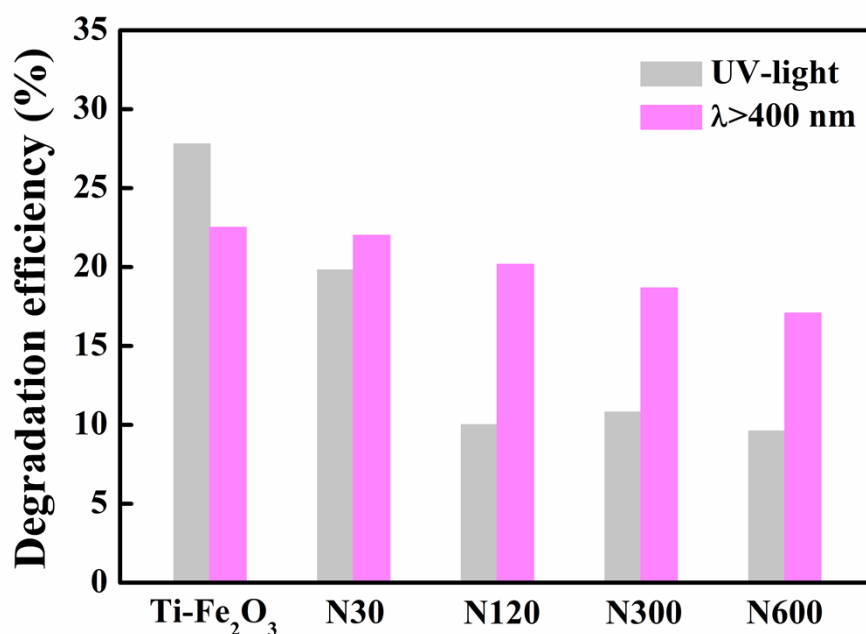

Fig. S3. Photoelectrodegradation efficiencies of Ti-Fe<sub>2</sub>O<sub>3</sub> and Ni(OH)<sub>2</sub>/Ti-Fe<sub>2</sub>O<sub>3</sub> with different electro-deposition time under UV-light irradiation for 2 h (gray) and λ>400 nm irradiation 1h (magenta). We used a three electrode configuration with Ag/AgCl reference electrode, Pt wire counter electrode and the as-obtained films working electrode with an active area of 0.675 cm<sup>2</sup> in photoelectrodegradation measurements. The degradation solution volume is 9 mL with RhB (2.5 mg/L) and NaSO<sub>4</sub> (0.1 M) and the potential is 0.3 V vs. Ag/AgCl.
